# Supplementary material for: Predictors of cognitive impairment in patients undergoing ileostomy for colorectal cancer: a retrospective analysis
Source: PeerJ. 2023 Jun 5;11:e15405. doi: 10.7717/peerj.15405 (PMC10249619; doi:10.7717/peerj.15405)
Supplement: Data S1 [file peerj-11-15405-s001.xlsx]

## Sheet: rawdata
		1 Male		1 Rural	0 illiteracy	1 married	1 Yes	1 Yes	1 Yes	1 Yes	1 Yes	1 low	I–II 1	0 Balanced diet	1 Yes	1 Yes		1 Yes	1 Independent	1 Yes
		2 Female		2 Urban	1 Elementary	2 Single or divorced	0 No	0 No	0 No	0 No	0 No	2 medium	III 2	1 Carnivorous	0 No	0 No		0 No	2 Independent with walking aid	0 No
				3 Centra	2 Secondary or above	3 widowed						3 high		2 Vegetarian					3 Dependent of support care or unable to move
ID	Age	Gender	BMI	Address	Education	Marital_status	Hypertension	Dyslipidemia	Diabetes	Smoking	Drinking	Exercise_strength	Pathological_stage	Diet	Complications	CRA	PSQI	Chemotherapy	Mobility	Cognitive_Impairment
1	68	Male	22.88	Rural	Secondary or above	Married	No	No	No	No	Yes	Low	I–II	Vegetarian	No	Yes	4	No	Independent with walking aid	No
2	66	Female	29.18	Rural	Secondary or above	Married	No	No	No	No	Yes	High	I–II	Balanced diet	No	No	7	Yes	Independent with walking aid	No
3	68	Female	26.36	Rural	Secondary or above	Married	No	No	No	No	No	Medium	III	Carnivorous	No	Yes	4	Yes	Independent	No
4	65	Female	23.25	Rural	Secondary or above	Married	No	No	No	No	Yes	Medium	III	Balanced diet	No	Yes	4	No	Independent	No
5	78	Male	27.1	Centra	Elementary	Married	Yes	No	No	Yes	No	Medium	III	Carnivorous	Yes	Yes	1	No	Independent	No
6	72	Male	24.7	Rural	Elementary	Married	No	No	No	No	No	Medium	III	Carnivorous	No	No	8	No	Independent	No
7	73	Female	28.34	Rural	Secondary or above	Married	No	No	No	No	No	Medium	III	Vegetarian	No	Yes	5	No	Independent	No
8	80	Male	28.67	Urban	Secondary or above	Married	No	No	No	Yes	Yes	High	I–II	Vegetarian	No	Yes	6	No	Independent with walking aid	No
9	68	Male	21.04	Urban	Secondary or above	Married	No	No	No	Yes	Yes	Medium	III	Balanced diet	No	Yes	5	No	Independent	No
10	69	Female	23.38	Rural	Secondary or above	Single or divorced	Yes	No	Yes	No	Yes	High	III	Carnivorous	No	No	3	No	Independent	No
11	67	Male	29.93	Urban	Elementary	Married	No	Yes	No	Yes	Yes	Low	I–II	Carnivorous	No	Yes	7	No	Independent with walking aid	No
12	66	Female	28.6	Urban	Elementary	Married	Yes	Yes	No	No	No	Medium	III	Balanced diet	No	Yes	5	No	Independent	No
13	82	Female	24.86	Centra	Elementary	Widowed	No	No	No	No	No	Low	I–II	Vegetarian	Yes	No	3	No	Independent	No
14	70	Male	26.86	Centra	Secondary or above	Married	No	No	Yes	No	Yes	Medium	III	Carnivorous	Yes	Yes	5	No	Independent	No
15	72	Male	29.37	Centra	Secondary or above	Married	No	No	No	No	No	High	I–II	Carnivorous	No	No	10	No	Independent with walking aid	No
16	67	Female	28.23	Rural	Secondary or above	Married	Yes	Yes	Yes	No	No	Medium	III	Carnivorous	No	Yes	12	No	Independent	No
17	69	Female	25.71	Urban	Secondary or above	Widowed	No	No	No	No	Yes	Medium	III	Vegetarian	No	No	8	No	Independent	No
18	76	Female	27.52	Rural	Secondary or above	Widowed	No	No	No	No	No	Medium	III	Carnivorous	No	No	10	Yes	Independent	No
19	69	Female	23.27	Urban	Secondary or above	Widowed	Yes	No	Yes	No	No	Medium	III	Carnivorous	No	Yes	7	No	Independent	No
20	66	Male	25.79	Rural	Secondary or above	Married	No	No	No	Yes	Yes	Medium	III	Carnivorous	No	Yes	7	No	Independent	No
21	70	Male	21.97	Rural	Secondary or above	Married	No	No	No	No	No	High	I–II	Balanced diet	No	Yes	3	No	Independent with walking aid	No
22	71	Female	27.62	Rural	Secondary or above	Single or divorced	No	No	No	No	No	Medium	III	Balanced diet	No	Yes	13	Yes	Independent	No
23	72	Male	27.7	Rural	Secondary or above	Married	Yes	Yes	Yes	Yes	Yes	Low	I–II	Balanced diet	No	Yes	2	No	Independent with walking aid	No
24	68	Female	27.41	Urban	Secondary or above	Married	No	No	No	No	No	High	I–II	Balanced diet	No	Yes	10	No	Independent with walking aid	No
25	68	Female	23.61	Rural	Secondary or above	Widowed	No	Yes	No	No	No	Medium	III	Balanced diet	No	Yes	15	No	Independent	No
26	89	Female	18.29	Rural	Secondary or above	Married	No	No	No	No	No	Low	I–II	Vegetarian	No	Yes	6	No	Independent	No
27	66	Female	21.74	Centra	Elementary	Married	No	No	No	No	No	High	I–II	Carnivorous	No	No	8	No	Independent with walking aid	No
28	67	Female	25.48	Rural	Elementary	Widowed	No	Yes	Yes	No	No	Medium	III	Balanced diet	No	Yes	6	No	Independent	No
29	82	Female	24.21	Urban	Elementary	Married	Yes	No	No	No	No	Medium	III	Carnivorous	No	No	6	Yes	Independent	No
30	76	Male	26.38	Rural	Secondary or above	Married	No	No	No	No	No	Low	III	Vegetarian	No	Yes	10	No	Independent	No
31	67	Male	27.07	Rural	Secondary or above	Married	Yes	No	No	No	Yes	Medium	III	Vegetarian	Yes	No	19	Yes	Independent	No
32	72	Female	24.41	Rural	Secondary or above	Widowed	No	No	Yes	No	No	High	I–II	Carnivorous	No	No	5	Yes	Independent with walking aid	No
33	71	Male	29.68	Rural	Secondary or above	Married	No	No	No	No	Yes	Low	I–II	Carnivorous	Yes	No	8	No	Independent with walking aid	No
34	66	Female	25.93	Rural	Secondary or above	Married	No	No	No	No	Yes	Medium	I–II	Carnivorous	No	Yes	6	No	Independent	No
35	76	Female	26.38	Rural	Secondary or above	Widowed	Yes	Yes	No	No	Yes	Medium	III	Carnivorous	No	No	9	Yes	Independent	No
36	67	Male	24.09	Rural	Secondary or above	Married	No	Yes	No	Yes	No	Low	I–II	Carnivorous	No	Yes	0	No	Independent	No
37	82	Female	28.7	Rural	Elementary	Widowed	No	No	No	No	No	Medium	III	Carnivorous	No	Yes	7	No	Independent	No
38	66	Male	17.61	Centra	Secondary or above	Married	No	No	No	No	No	High	I–II	Vegetarian	No	Yes	6	No	Independent with walking aid	No
39	74	Female	27.4	Urban	Secondary or above	Widowed	No	No	No	No	No	Medium	III	Balanced diet	No	Yes	2	No	Independent	No
40	70	Male	16.79	Rural	Secondary or above	Married	No	No	No	Yes	Yes	High	I–II	Balanced diet	No	Yes	0	Yes	Independent with walking aid	No
41	65	Female	27.04	Rural	Secondary or above	Married	No	No	No	No	No	High	I–II	Carnivorous	No	Yes	3	No	Independent with walking aid	No
42	67	Female	25.77	Rural	Secondary or above	Married	Yes	Yes	Yes	No	No	Low	I–II	Vegetarian	No	Yes	14	No	Independent	No
43	70	Female	29.87	Rural	Secondary or above	Married	No	No	No	No	No	High	I–II	Vegetarian	No	Yes	12	No	Independent with walking aid	No
44	71	Female	21.14	Centra	Elementary	Widowed	No	No	No	No	Yes	Low	I–II	Carnivorous	No	Yes	5	Yes	Independent	No
45	80	Female	26.48	Urban	Elementary	Married	No	No	No	No	No	Medium	III	Carnivorous	No	Yes	6	Yes	Independent	No
46	66	Male	26.47	Centra	Elementary	Married	Yes	No	No	No	Yes	Low	III	Balanced diet	No	No	8	No	Independent	No
47	66	Male	31.5	Rural	Elementary	Married	No	No	No	Yes	No	High	I–II	Vegetarian	Yes	Yes	8	No	Independent with walking aid	No
48	78	Female	22.94	Rural	Elementary	Widowed	No	No	No	No	No	High	I–II	Balanced diet	No	Yes	4	No	Independent with walking aid	No
49	71	Female	26.18	Urban	Illiteracy	Widowed	No	Yes	Yes	No	No	Low	I–II	Carnivorous	No	No	3	Yes	Independent	No
50	68	Female	22.58	Centra	Elementary	Married	No	No	No	No	No	High	I–II	Carnivorous	No	Yes	1	No	Independent with walking aid	No
51	71	Female	26.93	Centra	Elementary	Widowed	No	No	No	No	No	Low	I–II	Vegetarian	No	Yes	1	Yes	Independent	No
52	67	Female	19.87	Rural	Secondary or above	Widowed	No	No	No	No	No	Low	I–II	Vegetarian	No	No	6	No	Dependent of support care or unable to move	No
53	71	Female	20.45	Rural	Secondary or above	Married	No	No	No	No	No	Low	I–II	Carnivorous	No	Yes	9	Yes	Dependent of support care or unable to move	No
54	72	Female	19.94	Centra	Elementary	Married	No	No	No	No	No	High	I–II	Carnivorous	No	No	7	No	Independent with walking aid	No
55	71	Male	24.72	Rural	Elementary	Married	Yes	Yes	Yes	Yes	Yes	Low	I–II	Vegetarian	No	Yes	9	No	Independent with walking aid	No
56	67	Male	31.06	Centra	Secondary or above	Married	No	No	No	No	No	High	I–II	Balanced diet	No	Yes	10	No	Independent with walking aid	No
57	80.5	Female	24.71	Rural	Secondary or above	Married	No	Yes	No	No	No	Medium	III	Carnivorous	Yes	Yes	10	No	Independent	Yes
58	72.5	Female	21.53	Rural	Secondary or above	Married	Yes	Yes	No	No	Yes	Low	I–II	Carnivorous	Yes	Yes	8	No	Independent with walking aid	Yes
59	77.5	Male	24.5	Urban	Secondary or above	Married	No	No	No	No	Yes	High	III	Vegetarian	Yes	Yes	8	Yes	Independent	Yes
60	70.5	Female	22.42	Rural	Secondary or above	Married	No	No	No	No	No	Low	III	Carnivorous	No	Yes	9	No	Independent	Yes
61	71.5	Female	23.92	Rural	Secondary or above	Married	No	No	No	No	No	Medium	I–II	Balanced diet	No	Yes	6	No	Independent with walking aid	Yes
62	81.5	Female	23.4	Rural	Elementary	Married	Yes	No	Yes	Yes	No	Low	III	Carnivorous	Yes	Yes	10	No	Dependent of support care or unable to move	Yes
63	80.5	Female	21.18	Urban	Elementary	Widowed	No	No	No	No	No	Medium	III	Balanced diet	No	Yes	7	No	Independent	Yes
64	71.5	Female	20.34	Rural	Secondary or above	Married	No	Yes	No	No	No	Medium	III	Carnivorous	No	Yes	7	No	Independent	Yes
65	69.5	Male	19.95	Urban	Secondary or above	Married	No	No	No	Yes	Yes	Medium	I–II	Vegetarian	Yes	No	5	No	Independent with walking aid	Yes
66	73.5	Male	20.75	Centra	Elementary	Married	No	No	No	No	Yes	High	I–II	Vegetarian	Yes	Yes	7	No	Independent with walking aid	Yes
67	72.5	Male	23.13	Centra	Secondary or above	Married	No	No	No	No	Yes	Low	I–II	Vegetarian	Yes	Yes	13	No	Dependent of support care or unable to move	Yes
68	72.5	Male	23.45	Rural	Secondary or above	Married	Yes	No	No	Yes	Yes	Medium	I–II	Carnivorous	No	Yes	3	No	Independent with walking aid	Yes
69	77.5	Male	23.5	Rural	Secondary or above	Married	Yes	Yes	No	No	Yes	Low	I–II	Carnivorous	No	Yes	5	Yes	Independent with walking aid	Yes
70	71.5	Male	24.09	Rural	Secondary or above	Married	Yes	Yes	No	Yes	Yes	Low	I–II	Vegetarian	No	Yes	11	No	Independent with walking aid	Yes
71	80.5	Male	22.94	Urban	Elementary	Married	No	No	Yes	Yes	Yes	Low	III	Carnivorous	Yes	Yes	10	No	Independent with walking aid	Yes
72	70.5	Male	19.77	Centra	Illiteracy	Single or divorced	No	No	No	No	No	Low	III	Balanced diet	No	Yes	6	No	Independent	Yes
73	70.5	Female	21.32	Centra	Elementary	Married	Yes	No	No	No	Yes	Medium	I–II	Balanced diet	No	Yes	9	Yes	Independent with walking aid	Yes
74	69.5	Male	25.54	Rural	Elementary	Married	No	No	No	No	No	High	I–II	Vegetarian	Yes	Yes	13	No	Dependent of support care or unable to move	Yes
75	72.5	Female	21.7	Rural	Elementary	Married	No	No	No	No	No	Low	I–II	Carnivorous	No	Yes	6	No	Independent with walking aid	Yes
76	72.5	Female	22.63	Rural	Elementary	Married	No	No	No	No	Yes	Low	I–II	Carnivorous	No	No	8	Yes	Independent with walking aid	Yes
77	79.5	Female	26.48	Rural	Elementary	Widowed	Yes	No	Yes	No	No	Low	III	Balanced diet	No	Yes	5	No	Independent	Yes
78	75.5	Female	26.5	Rural	Elementary	Married	Yes	No	No	No	No	Medium	III	Carnivorous	No	Yes	8	No	Independent	Yes
79	71.5	Male	22.82	Centra	Secondary or above	Married	No	No	No	No	Yes	Low	I–II	Carnivorous	No	Yes	9	No	Independent with walking aid	Yes
80	69.5	Male	25.57	Rural	Secondary or above	Married	No	No	No	Yes	Yes	Low	III	Carnivorous	No	Yes	12	No	Independent	Yes
81	70.5	Female	23.56	Rural	Elementary	Married	Yes	No	Yes	No	No	Low	III	Carnivorous	Yes	Yes	3	No	Independent	Yes
82	70.5	Male	23.07	Rural	Secondary or above	Married	No	No	Yes	Yes	Yes	Low	I–II	Balanced diet	Yes	No	6	No	Independent with walking aid	Yes
83	88.5	Male	19.05	Rural	Secondary or above	Widowed	Yes	No	No	No	No	Low	III	Carnivorous	No	Yes	6	No	Independent	Yes
84	85.5	Male	25.79	Centra	Secondary or above	Married	Yes	No	Yes	Yes	Yes	Low	III	Carnivorous	No	Yes	13	No	Independent	Yes
85	70.5	Male	17.37	Urban	Secondary or above	Married	No	Yes	No	Yes	Yes	Low	III	Vegetarian	No	Yes	1	No	Independent	Yes
86	70.5	Male	26.2	Rural	Secondary or above	Married	Yes	Yes	No	No	Yes	Low	III	Carnivorous	Yes	Yes	16	No	Independent with walking aid	Yes
87	78.5	Male	24.59	Centra	Secondary or above	Married	Yes	Yes	No	No	No	Medium	III	Carnivorous	No	Yes	2	No	Independent	Yes
88	71.5	Female	22.37	Rural	Secondary or above	Married	No	No	Yes	No	No	Low	I–II	Balanced diet	No	Yes	8	No	Independent with walking aid	Yes
89	76.5	Male	27.03	Urban	Secondary or above	Married	No	No	No	No	No	Medium	III	Vegetarian	Yes	Yes	3	No	Independent with walking aid	Yes
90	72.5	Female	26.85	Urban	Secondary or above	Married	No	Yes	No	No	No	Medium	I–II	Balanced diet	No	Yes	3	No	Independent with walking aid	Yes
91	69.5	Male	24.59	Centra	Secondary or above	Married	No	No	Yes	Yes	Yes	Low	III	Vegetarian	No	Yes	9	No	Independent	Yes
92	73.5	Male	22.63	Rural	Secondary or above	Married	No	No	No	No	No	High	I–II	Vegetarian	Yes	Yes	7	Yes	Independent with walking aid	Yes
93	80.5	Male	21.09	Rural	Secondary or above	Married	No	No	No	No	Yes	Low	III	Carnivorous	No	Yes	5	No	Independent	Yes
94	77.5	Female	23.45	Urban	Secondary or above	Married	Yes	Yes	No	No	Yes	Low	I–II	Vegetarian	Yes	Yes	14	Yes	Independent with walking aid	Yes
95	69.5	Female	22.77	Rural	Secondary or above	Single or divorced	No	No	No	No	Yes	Medium	I–II	Balanced diet	Yes	Yes	4	No	Independent with walking aid	Yes
96	73.5	Female	27.98	Rural	Secondary or above	Widowed	Yes	Yes	No	No	No	Low	I–II	Carnivorous	No	No	10	No	Independent with walking aid	Yes
97	82.5	Male	34.41	Rural	Secondary or above	Married	No	No	Yes	No	No	Medium	III	Carnivorous	No	Yes	6	No	Independent	Yes
98	71.5	Female	26.27	Centra	Elementary	Widowed	No	No	Yes	No	Yes	Low	III	Balanced diet	Yes	Yes	8	No	Independent	Yes
99	71.5	Male	21.99	Centra	Elementary	Married	No	No	No	No	No	Medium	I–II	Vegetarian	No	Yes	8	No	Independent with walking aid	Yes
100	75.5	Female	27.1	Centra	Elementary	Married	No	No	No	No	Yes	Low	III	Carnivorous	No	Yes	7	Yes	Independent	Yes
101	72.5	Female	28.13	Rural	Elementary	Married	Yes	No	No	No	No	Medium	I–II	Carnivorous	No	Yes	12	No	Independent with walking aid	Yes
102	70.5	Female	22.19	Rural	Illiteracy	Married	No	No	No	No	Yes	Medium	I–II	Vegetarian	No	Yes	11	No	Dependent of support care or unable to move	Yes
103	69.5	Female	18.72	Rural	Elementary	Widowed	No	No	Yes	No	No	Low	I–II	Balanced diet	No	Yes	11	No	Dependent of support care or unable to move	Yes
104	81.5	Male	22.91	Centra	Elementary	Married	Yes	No	No	Yes	Yes	High	I–II	Balanced diet	No	Yes	2	No	Independent with walking aid	Yes
105	69.5	Female	25.13	Rural	Elementary	Married	No	No	No	No	No	Low	I–II	Carnivorous	No	Yes	9	No	Independent with walking aid	Yes
106	70.5	Female	25.4	Rural	Elementary	Married	No	No	No	No	Yes	Low	I–II	Carnivorous	No	Yes	6	No	Independent with walking aid	Yes
107	82.5	Female	21.9	Centra	Elementary	Married	Yes	No	Yes	No	Yes	Low	III	Carnivorous	No	Yes	5	No	Independent	Yes
108	69.5	Female	29.75	Rural	Elementary	Married	No	No	No	No	Yes	High	I–II	Vegetarian	Yes	Yes	1	No	Independent with walking aid	Yes

## Sheet: ROC + bar
Age	BMI	Cognitive_Impairment	Exercise_strength	Complications	CRA	Mobility
68	22.88	No	Low	No	Yes	Independent with walking aid
66	29.18	No	High	No	No	Independent with walking aid
68	26.36	No	Medium	No	Yes	Independent
65	23.25	No	Medium	No	Yes	Independent
78	27.1	No	Medium	Yes	Yes	Independent
72	24.7	No	Medium	No	No	Independent
73	28.34	No	Medium	No	Yes	Independent
80	28.67	No	High	No	Yes	Independent with walking aid
68	21.04	No	Medium	No	Yes	Independent
69	23.38	No	High	No	No	Independent
67	29.93	No	Low	No	Yes	Independent with walking aid
66	28.6	No	Medium	No	Yes	Independent
82	24.86	No	Low	Yes	No	Independent
70	26.86	No	Medium	Yes	Yes	Independent
72	29.37	No	High	No	No	Independent with walking aid
67	28.23	No	Medium	No	Yes	Independent
69	25.71	No	Medium	No	No	Independent
76	27.52	No	Medium	No	No	Independent
69	23.27	No	Medium	No	Yes	Independent
66	25.79	No	Medium	No	Yes	Independent
70	21.97	No	High	No	Yes	Independent with walking aid
71	27.62	No	Medium	No	Yes	Independent
72	27.7	No	Low	No	Yes	Independent with walking aid
68	27.41	No	High	No	Yes	Independent with walking aid
68	23.61	No	Medium	No	Yes	Independent
89	18.29	No	Low	No	Yes	Independent
66	21.74	No	High	No	No	Independent with walking aid
67	25.48	No	Medium	No	Yes	Independent
82	24.21	No	Medium	No	No	Independent
76	26.38	No	Low	No	Yes	Independent
67	27.07	No	Medium	Yes	No	Independent
72	24.41	No	High	No	No	Independent with walking aid
71	29.68	No	Low	Yes	No	Independent with walking aid
66	25.93	No	Medium	No	Yes	Independent
76	26.38	No	Medium	No	No	Independent
67	24.09	No	Low	No	Yes	Independent
82	28.7	No	Medium	No	Yes	Independent
66	17.61	No	High	No	Yes	Independent with walking aid
74	27.4	No	Medium	No	Yes	Independent
70	16.79	No	High	No	Yes	Independent with walking aid
65	27.04	No	High	No	Yes	Independent with walking aid
67	25.77	No	Low	No	Yes	Independent
70	29.87	No	High	No	Yes	Independent with walking aid
71	21.14	No	Low	No	Yes	Independent
80	26.48	No	Medium	No	Yes	Independent
66	26.47	No	Low	No	No	Independent
66	31.5	No	High	Yes	Yes	Independent with walking aid
78	22.94	No	High	No	Yes	Independent with walking aid
71	26.18	No	Low	No	No	Independent
68	22.58	No	High	No	Yes	Independent with walking aid
71	26.93	No	Low	No	Yes	Independent
67	19.87	No	Low	No	No	Dependent of support care or unable to move
71	20.45	No	Low	No	Yes	Dependent of support care or unable to move
72	19.94	No	High	No	No	Independent with walking aid
71	24.72	No	Low	No	Yes	Independent with walking aid
67	31.06	No	High	No	Yes	Independent with walking aid
80.5	24.71	Yes	Medium	Yes	Yes	Independent
72.5	21.53	Yes	Low	Yes	Yes	Independent with walking aid
77.5	24.5	Yes	High	Yes	Yes	Independent
70.5	22.42	Yes	Low	No	Yes	Independent
71.5	23.92	Yes	Medium	No	Yes	Independent with walking aid
81.5	23.4	Yes	Low	Yes	Yes	Dependent of support care or unable to move
80.5	21.18	Yes	Medium	No	Yes	Independent
71.5	20.34	Yes	Medium	No	Yes	Independent
69.5	19.95	Yes	Medium	Yes	No	Independent with walking aid
73.5	20.75	Yes	High	Yes	Yes	Independent with walking aid
72.5	23.13	Yes	Low	Yes	Yes	Dependent of support care or unable to move
72.5	23.45	Yes	Medium	No	Yes	Independent with walking aid
77.5	23.5	Yes	Low	No	Yes	Independent with walking aid
71.5	24.09	Yes	Low	No	Yes	Independent with walking aid
80.5	22.94	Yes	Low	Yes	Yes	Independent with walking aid
70.5	19.77	Yes	Low	No	Yes	Independent
70.5	21.32	Yes	Medium	No	Yes	Independent with walking aid
69.5	25.54	Yes	High	Yes	Yes	Dependent of support care or unable to move
72.5	21.7	Yes	Low	No	Yes	Independent with walking aid
72.5	22.63	Yes	Low	No	No	Independent with walking aid
79.5	26.48	Yes	Low	No	Yes	Independent
75.5	26.5	Yes	Medium	No	Yes	Independent
71.5	22.82	Yes	Low	No	Yes	Independent with walking aid
69.5	25.57	Yes	Low	No	Yes	Independent
70.5	23.56	Yes	Low	Yes	Yes	Independent
70.5	23.07	Yes	Low	Yes	No	Independent with walking aid
88.5	19.05	Yes	Low	No	Yes	Independent
85.5	25.79	Yes	Low	No	Yes	Independent
70.5	17.37	Yes	Low	No	Yes	Independent
70.5	26.2	Yes	Low	Yes	Yes	Independent with walking aid
78.5	24.59	Yes	Medium	No	Yes	Independent
71.5	22.37	Yes	Low	No	Yes	Independent with walking aid
76.5	27.03	Yes	Medium	Yes	Yes	Independent with walking aid
72.5	26.85	Yes	Medium	No	Yes	Independent with walking aid
69.5	24.59	Yes	Low	No	Yes	Independent
73.5	22.63	Yes	High	Yes	Yes	Independent with walking aid
80.5	21.09	Yes	Low	No	Yes	Independent
77.5	23.45	Yes	Low	Yes	Yes	Independent with walking aid
69.5	22.77	Yes	Medium	Yes	Yes	Independent with walking aid
73.5	27.98	Yes	Low	No	No	Independent with walking aid
82.5	34.41	Yes	Medium	No	Yes	Independent
71.5	26.27	Yes	Low	Yes	Yes	Independent
71.5	21.99	Yes	Medium	No	Yes	Independent with walking aid
75.5	27.1	Yes	Low	No	Yes	Independent
72.5	28.13	Yes	Medium	No	Yes	Independent with walking aid
70.5	22.19	Yes	Medium	No	Yes	Dependent of support care or unable to move
69.5	18.72	Yes	Low	No	Yes	Dependent of support care or unable to move
81.5	22.91	Yes	High	No	Yes	Independent with walking aid
69.5	25.13	Yes	Low	No	Yes	Independent with walking aid
70.5	25.4	Yes	Low	No	Yes	Independent with walking aid
82.5	21.9	Yes	Low	No	Yes	Independent
69.5	29.75	Yes	High	Yes	Yes	Independent with walking aid

## Sheet: Table1 baseline
ID	Age	Gender	BMI	Address	Education	Marital_status	Hypertension	Dyslipidemia	Diabetes	Smoking	Drinking	Cognitive_Impairment
1	68	Male	22.88	Rural	Secondary or above	Married	No	No	No	No	Yes	No
2	66	Female	29.18	Rural	Secondary or above	Married	No	No	No	No	Yes	No
3	68	Female	26.36	Rural	Secondary or above	Married	No	No	No	No	No	No
4	65	Female	23.25	Rural	Secondary or above	Married	No	No	No	No	Yes	No
5	78	Male	27.1	Centra	Elementary	Married	Yes	No	No	Yes	No	No
6	72	Male	24.7	Rural	Elementary	Married	No	No	No	No	No	No
7	73	Female	28.34	Rural	Secondary or above	Married	No	No	No	No	No	No
8	80	Male	28.67	Urban	Secondary or above	Married	No	No	No	Yes	Yes	No
9	68	Male	21.04	Urban	Secondary or above	Married	No	No	No	Yes	Yes	No
10	69	Female	23.38	Rural	Secondary or above	Single or divorced	Yes	No	Yes	No	Yes	No
11	67	Male	29.93	Urban	Elementary	Married	No	Yes	No	Yes	Yes	No
12	66	Female	28.6	Urban	Elementary	Married	Yes	Yes	No	No	No	No
13	82	Female	24.86	Centra	Elementary	Widowed	No	No	No	No	No	No
14	70	Male	26.86	Centra	Secondary or above	Married	No	No	Yes	No	Yes	No
15	72	Male	29.37	Centra	Secondary or above	Married	No	No	No	No	No	No
16	67	Female	28.23	Rural	Secondary or above	Married	Yes	Yes	Yes	No	No	No
17	69	Female	25.71	Urban	Secondary or above	Widowed	No	No	No	No	Yes	No
18	76	Female	27.52	Rural	Secondary or above	Widowed	No	No	No	No	No	No
19	69	Female	23.27	Urban	Secondary or above	Widowed	Yes	No	Yes	No	No	No
20	66	Male	25.79	Rural	Secondary or above	Married	No	No	No	Yes	Yes	No
21	70	Male	21.97	Rural	Secondary or above	Married	No	No	No	No	No	No
22	71	Female	27.62	Rural	Secondary or above	Single or divorced	No	No	No	No	No	No
23	72	Male	27.7	Rural	Secondary or above	Married	Yes	Yes	Yes	Yes	Yes	No
24	68	Female	27.41	Urban	Secondary or above	Married	No	No	No	No	No	No
25	68	Female	23.61	Rural	Secondary or above	Widowed	No	Yes	No	No	No	No
26	89	Female	18.29	Rural	Secondary or above	Married	No	No	No	No	No	No
27	66	Female	21.74	Centra	Elementary	Married	No	No	No	No	No	No
28	67	Female	25.48	Rural	Elementary	Widowed	No	Yes	Yes	No	No	No
29	82	Female	24.21	Urban	Elementary	Married	Yes	No	No	No	No	No
30	76	Male	26.38	Rural	Secondary or above	Married	No	No	No	No	No	No
31	67	Male	27.07	Rural	Secondary or above	Married	Yes	No	No	No	Yes	No
32	72	Female	24.41	Rural	Secondary or above	Widowed	No	No	Yes	No	No	No
33	71	Male	29.68	Rural	Secondary or above	Married	No	No	No	No	Yes	No
34	66	Female	25.93	Rural	Secondary or above	Married	No	No	No	No	Yes	No
35	76	Female	26.38	Rural	Secondary or above	Widowed	Yes	Yes	No	No	Yes	No
36	67	Male	24.09	Rural	Secondary or above	Married	No	Yes	No	Yes	No	No
37	82	Female	28.7	Rural	Elementary	Widowed	No	No	No	No	No	No
38	66	Male	17.61	Centra	Secondary or above	Married	No	No	No	No	No	No
39	74	Female	27.4	Urban	Secondary or above	Widowed	No	No	No	No	No	No
40	70	Male	16.79	Rural	Secondary or above	Married	No	No	No	Yes	Yes	No
41	65	Female	27.04	Rural	Secondary or above	Married	No	No	No	No	No	No
42	67	Female	25.77	Rural	Secondary or above	Married	Yes	Yes	Yes	No	No	No
43	70	Female	29.87	Rural	Secondary or above	Married	No	No	No	No	No	No
44	71	Female	21.14	Centra	Elementary	Widowed	No	No	No	No	Yes	No
45	80	Female	26.48	Urban	Elementary	Married	No	No	No	No	No	No
46	66	Male	26.47	Centra	Elementary	Married	Yes	No	No	No	Yes	No
47	66	Male	31.5	Rural	Elementary	Married	No	No	No	Yes	No	No
48	78	Female	22.94	Rural	Elementary	Widowed	No	No	No	No	No	No
49	71	Female	26.18	Urban	Illiteracy	Widowed	No	Yes	Yes	No	No	No
50	68	Female	22.58	Centra	Elementary	Married	No	No	No	No	No	No
51	71	Female	26.93	Centra	Elementary	Widowed	No	No	No	No	No	No
52	67	Female	19.87	Rural	Secondary or above	Widowed	No	No	No	No	No	No
53	71	Female	20.45	Rural	Secondary or above	Married	No	No	No	No	No	No
54	72	Female	19.94	Centra	Elementary	Married	No	No	No	No	No	No
55	71	Male	24.72	Rural	Elementary	Married	Yes	Yes	Yes	Yes	Yes	No
56	67	Male	31.06	Centra	Secondary or above	Married	No	No	No	No	No	No
57	80.5	Female	24.71	Rural	Secondary or above	Married	No	Yes	No	No	No	Yes
58	72.5	Female	21.53	Rural	Secondary or above	Married	Yes	Yes	No	No	Yes	Yes
59	77.5	Male	24.5	Urban	Secondary or above	Married	No	No	No	No	Yes	Yes
60	70.5	Female	22.42	Rural	Secondary or above	Married	No	No	No	No	No	Yes
61	71.5	Female	23.92	Rural	Secondary or above	Married	No	No	No	No	No	Yes
62	81.5	Female	23.4	Rural	Elementary	Married	Yes	No	Yes	Yes	No	Yes
63	80.5	Female	21.18	Urban	Elementary	Widowed	No	No	No	No	No	Yes
64	71.5	Female	20.34	Rural	Secondary or above	Married	No	Yes	No	No	No	Yes
65	69.5	Male	19.95	Urban	Secondary or above	Married	No	No	No	Yes	Yes	Yes
66	73.5	Male	20.75	Centra	Elementary	Married	No	No	No	No	Yes	Yes
67	72.5	Male	23.13	Centra	Secondary or above	Married	No	No	No	No	Yes	Yes
68	72.5	Male	23.45	Rural	Secondary or above	Married	Yes	No	No	Yes	Yes	Yes
69	77.5	Male	23.5	Rural	Secondary or above	Married	Yes	Yes	No	No	Yes	Yes
70	71.5	Male	24.09	Rural	Secondary or above	Married	Yes	Yes	No	Yes	Yes	Yes
71	80.5	Male	22.94	Urban	Elementary	Married	No	No	Yes	Yes	Yes	Yes
72	70.5	Male	19.77	Centra	Illiteracy	Single or divorced	No	No	No	No	No	Yes
73	70.5	Female	21.32	Centra	Elementary	Married	Yes	No	No	No	Yes	Yes
74	69.5	Male	25.54	Rural	Elementary	Married	No	No	No	No	No	Yes
75	72.5	Female	21.7	Rural	Elementary	Married	No	No	No	No	No	Yes
76	72.5	Female	22.63	Rural	Elementary	Married	No	No	No	No	Yes	Yes
77	79.5	Female	26.48	Rural	Elementary	Widowed	Yes	No	Yes	No	No	Yes
78	75.5	Female	26.5	Rural	Elementary	Married	Yes	No	No	No	No	Yes
79	71.5	Male	22.82	Centra	Secondary or above	Married	No	No	No	No	Yes	Yes
80	69.5	Male	25.57	Rural	Secondary or above	Married	No	No	No	Yes	Yes	Yes
81	70.5	Female	23.56	Rural	Elementary	Married	Yes	No	Yes	No	No	Yes
82	70.5	Male	23.07	Rural	Secondary or above	Married	No	No	Yes	Yes	Yes	Yes
83	88.5	Male	19.05	Rural	Secondary or above	Widowed	Yes	No	No	No	No	Yes
84	85.5	Male	25.79	Centra	Secondary or above	Married	Yes	No	Yes	Yes	Yes	Yes
85	70.5	Male	17.37	Urban	Secondary or above	Married	No	Yes	No	Yes	Yes	Yes
86	70.5	Male	26.2	Rural	Secondary or above	Married	Yes	Yes	No	No	Yes	Yes
87	78.5	Male	24.59	Centra	Secondary or above	Married	Yes	Yes	No	No	No	Yes
88	71.5	Female	22.37	Rural	Secondary or above	Married	No	No	Yes	No	No	Yes
89	76.5	Male	27.03	Urban	Secondary or above	Married	No	No	No	No	No	Yes
90	72.5	Female	26.85	Urban	Secondary or above	Married	No	Yes	No	No	No	Yes
91	69.5	Male	24.59	Centra	Secondary or above	Married	No	No	Yes	Yes	Yes	Yes
92	73.5	Male	22.63	Rural	Secondary or above	Married	No	No	No	No	No	Yes
93	80.5	Male	21.09	Rural	Secondary or above	Married	No	No	No	No	Yes	Yes
94	77.5	Female	23.45	Urban	Secondary or above	Married	Yes	Yes	No	No	Yes	Yes
95	69.5	Female	22.77	Rural	Secondary or above	Single or divorced	No	No	No	No	Yes	Yes
96	73.5	Female	27.98	Rural	Secondary or above	Widowed	Yes	Yes	No	No	No	Yes
97	82.5	Male	34.41	Rural	Secondary or above	Married	No	No	Yes	No	No	Yes
98	71.5	Female	26.27	Centra	Elementary	Widowed	No	No	Yes	No	Yes	Yes
99	71.5	Male	21.99	Centra	Elementary	Married	No	No	No	No	No	Yes
100	75.5	Female	27.1	Centra	Elementary	Married	No	No	No	No	Yes	Yes
101	72.5	Female	28.13	Rural	Elementary	Married	Yes	No	No	No	No	Yes
102	70.5	Female	22.19	Rural	Illiteracy	Married	No	No	No	No	Yes	Yes
103	69.5	Female	18.72	Rural	Elementary	Widowed	No	No	Yes	No	No	Yes
104	81.5	Male	22.91	Centra	Elementary	Married	Yes	No	No	Yes	Yes	Yes
105	69.5	Female	25.13	Rural	Elementary	Married	No	No	No	No	No	Yes
106	70.5	Female	25.4	Rural	Elementary	Married	No	No	No	No	Yes	Yes
107	82.5	Female	21.9	Centra	Elementary	Married	Yes	No	Yes	No	Yes	Yes
108	69.5	Female	29.75	Rural	Elementary	Married	No	No	No	No	Yes	Yes

## Sheet: Table2 outcomes
ID	Exercise_strength	Pathological_stage	Diet	Complications	CRA	PSQI	Chemotherapy	Mobility	Cognitive_Impairment
1	Low	I–II	Vegetarian	No	Yes	4	No	Independent with walking aid	No
2	High	I–II	Balanced diet	No	No	7	Yes	Independent with walking aid	No
3	Medium	III	Carnivorous	No	Yes	4	Yes	Independent	No
4	Medium	III	Balanced diet	No	Yes	4	No	Independent	No
5	Medium	III	Carnivorous	Yes	Yes	1	No	Independent	No
6	Medium	III	Carnivorous	No	No	8	No	Independent	No
7	Medium	III	Vegetarian	No	Yes	5	No	Independent	No
8	High	I–II	Vegetarian	No	Yes	6	No	Independent with walking aid	No
9	Medium	III	Balanced diet	No	Yes	5	No	Independent	No
10	High	III	Carnivorous	No	No	3	No	Independent	No
11	Low	I–II	Carnivorous	No	Yes	7	No	Independent with walking aid	No
12	Medium	III	Balanced diet	No	Yes	5	No	Independent	No
13	Low	I–II	Vegetarian	Yes	No	3	No	Independent	No
14	Medium	III	Carnivorous	Yes	Yes	5	No	Independent	No
15	High	I–II	Carnivorous	No	No	10	No	Independent with walking aid	No
16	Medium	III	Carnivorous	No	Yes	12	No	Independent	No
17	Medium	III	Vegetarian	No	No	8	No	Independent	No
18	Medium	III	Carnivorous	No	No	10	Yes	Independent	No
19	Medium	III	Carnivorous	No	Yes	7	No	Independent	No
20	Medium	III	Carnivorous	No	Yes	7	No	Independent	No
21	High	I–II	Balanced diet	No	Yes	3	No	Independent with walking aid	No
22	Medium	III	Balanced diet	No	Yes	13	Yes	Independent	No
23	Low	I–II	Balanced diet	No	Yes	2	No	Independent with walking aid	No
24	High	I–II	Balanced diet	No	Yes	10	No	Independent with walking aid	No
25	Medium	III	Balanced diet	No	Yes	15	No	Independent	No
26	Low	I–II	Vegetarian	No	Yes	6	No	Independent	No
27	High	I–II	Carnivorous	No	No	8	No	Independent with walking aid	No
28	Medium	III	Balanced diet	No	Yes	6	No	Independent	No
29	Medium	III	Carnivorous	No	No	6	Yes	Independent	No
30	Low	III	Vegetarian	No	Yes	10	No	Independent	No
31	Medium	III	Vegetarian	Yes	No	19	Yes	Independent	No
32	High	I–II	Carnivorous	No	No	5	Yes	Independent with walking aid	No
33	Low	I–II	Carnivorous	Yes	No	8	No	Independent with walking aid	No
34	Medium	I–II	Carnivorous	No	Yes	6	No	Independent	No
35	Medium	III	Carnivorous	No	No	9	Yes	Independent	No
36	Low	I–II	Carnivorous	No	Yes	0	No	Independent	No
37	Medium	III	Carnivorous	No	Yes	7	No	Independent	No
38	High	I–II	Vegetarian	No	Yes	6	No	Independent with walking aid	No
39	Medium	III	Balanced diet	No	Yes	2	No	Independent	No
40	High	I–II	Balanced diet	No	Yes	0	Yes	Independent with walking aid	No
41	High	I–II	Carnivorous	No	Yes	3	No	Independent with walking aid	No
42	Low	I–II	Vegetarian	No	Yes	14	No	Independent	No
43	High	I–II	Vegetarian	No	Yes	12	No	Independent with walking aid	No
44	Low	I–II	Carnivorous	No	Yes	5	Yes	Independent	No
45	Medium	III	Carnivorous	No	Yes	6	Yes	Independent	No
46	Low	III	Balanced diet	No	No	8	No	Independent	No
47	High	I–II	Vegetarian	Yes	Yes	8	No	Independent with walking aid	No
48	High	I–II	Balanced diet	No	Yes	4	No	Independent with walking aid	No
49	Low	I–II	Carnivorous	No	No	3	Yes	Independent	No
50	High	I–II	Carnivorous	No	Yes	1	No	Independent with walking aid	No
51	Low	I–II	Vegetarian	No	Yes	1	Yes	Independent	No
52	Low	I–II	Vegetarian	No	No	6	No	Dependent of support care or unable to move	No
53	Low	I–II	Carnivorous	No	Yes	9	Yes	Dependent of support care or unable to move	No
54	High	I–II	Carnivorous	No	No	7	No	Independent with walking aid	No
55	Low	I–II	Vegetarian	No	Yes	9	No	Independent with walking aid	No
56	High	I–II	Balanced diet	No	Yes	10	No	Independent with walking aid	No
57	Medium	III	Carnivorous	Yes	Yes	10	No	Independent	Yes
58	Low	I–II	Carnivorous	Yes	Yes	8	No	Independent with walking aid	Yes
59	High	III	Vegetarian	Yes	Yes	8	Yes	Independent	Yes
60	Low	III	Carnivorous	No	Yes	9	No	Independent	Yes
61	Medium	I–II	Balanced diet	No	Yes	6	No	Independent with walking aid	Yes
62	Low	III	Carnivorous	Yes	Yes	10	No	Dependent of support care or unable to move	Yes
63	Medium	III	Balanced diet	No	Yes	7	No	Independent	Yes
64	Medium	III	Carnivorous	No	Yes	7	No	Independent	Yes
65	Medium	I–II	Vegetarian	Yes	No	5	No	Independent with walking aid	Yes
66	High	I–II	Vegetarian	Yes	Yes	7	No	Independent with walking aid	Yes
67	Low	I–II	Vegetarian	Yes	Yes	13	No	Dependent of support care or unable to move	Yes
68	Medium	I–II	Carnivorous	No	Yes	3	No	Independent with walking aid	Yes
69	Low	I–II	Carnivorous	No	Yes	5	Yes	Independent with walking aid	Yes
70	Low	I–II	Vegetarian	No	Yes	11	No	Independent with walking aid	Yes
71	Low	III	Carnivorous	Yes	Yes	10	No	Independent with walking aid	Yes
72	Low	III	Balanced diet	No	Yes	6	No	Independent	Yes
73	Medium	I–II	Balanced diet	No	Yes	9	Yes	Independent with walking aid	Yes
74	High	I–II	Vegetarian	Yes	Yes	13	No	Dependent of support care or unable to move	Yes
75	Low	I–II	Carnivorous	No	Yes	6	No	Independent with walking aid	Yes
76	Low	I–II	Carnivorous	No	No	8	Yes	Independent with walking aid	Yes
77	Low	III	Balanced diet	No	Yes	5	No	Independent	Yes
78	Medium	III	Carnivorous	No	Yes	8	No	Independent	Yes
79	Low	I–II	Carnivorous	No	Yes	9	No	Independent with walking aid	Yes
80	Low	III	Carnivorous	No	Yes	12	No	Independent	Yes
81	Low	III	Carnivorous	Yes	Yes	3	No	Independent	Yes
82	Low	I–II	Balanced diet	Yes	No	6	No	Independent with walking aid	Yes
83	Low	III	Carnivorous	No	Yes	6	No	Independent	Yes
84	Low	III	Carnivorous	No	Yes	13	No	Independent	Yes
85	Low	III	Vegetarian	No	Yes	1	No	Independent	Yes
86	Low	III	Carnivorous	Yes	Yes	16	No	Independent with walking aid	Yes
87	Medium	III	Carnivorous	No	Yes	2	No	Independent	Yes
88	Low	I–II	Balanced diet	No	Yes	8	No	Independent with walking aid	Yes
89	Medium	III	Vegetarian	Yes	Yes	3	No	Independent with walking aid	Yes
90	Medium	I–II	Balanced diet	No	Yes	3	No	Independent with walking aid	Yes
91	Low	III	Vegetarian	No	Yes	9	No	Independent	Yes
92	High	I–II	Vegetarian	Yes	Yes	7	Yes	Independent with walking aid	Yes
93	Low	III	Carnivorous	No	Yes	5	No	Independent	Yes
94	Low	I–II	Vegetarian	Yes	Yes	14	Yes	Independent with walking aid	Yes
95	Medium	I–II	Balanced diet	Yes	Yes	4	No	Independent with walking aid	Yes
96	Low	I–II	Carnivorous	No	No	10	No	Independent with walking aid	Yes
97	Medium	III	Carnivorous	No	Yes	6	No	Independent	Yes
98	Low	III	Balanced diet	Yes	Yes	8	No	Independent	Yes
99	Medium	I–II	Vegetarian	No	Yes	8	No	Independent with walking aid	Yes
100	Low	III	Carnivorous	No	Yes	7	Yes	Independent	Yes
101	Medium	I–II	Carnivorous	No	Yes	12	No	Independent with walking aid	Yes
102	Medium	I–II	Vegetarian	No	Yes	11	No	Dependent of support care or unable to move	Yes
103	Low	I–II	Balanced diet	No	Yes	11	No	Dependent of support care or unable to move	Yes
104	High	I–II	Balanced diet	No	Yes	2	No	Independent with walking aid	Yes
105	Low	I–II	Carnivorous	No	Yes	9	No	Independent with walking aid	Yes
106	Low	I–II	Carnivorous	No	Yes	6	No	Independent with walking aid	Yes
107	Low	III	Carnivorous	No	Yes	5	No	Independent	Yes
108	High	I–II	Vegetarian	Yes	Yes	1	No	Independent with walking aid	Yes
